1 **ResFinderFG v2.0: a database of antibiotic resistance genes obtained by functional**  
2 **metagenomics**

3 Rémi Gschwind<sup>1</sup>, Svetlana Ugarcina Perovic<sup>2</sup>, Marie Petitjean<sup>1</sup>, Julie Lao<sup>1</sup>, Luis Pedro Coelho<sup>2</sup>,  
4 Etienne Ruppé<sup>1\*</sup>

5 <sup>1</sup> Université Paris Cité and Université Sorbonne Paris Nord, Inserm, IAME, F-75018 Paris,  
6 France

7 <sup>2</sup> Institute of Science and Technology for Brain-Inspired Intelligence, Fudan University,  
8 Shanghai, China

9 \*Corresponding author:

10 Rémi GSCHWIND, PhD

11 INSERM UMR1137 IAME

12 Faculté de Médecine Bichat

13 16 rue Henri Huchard

14 75108 Paris, France

15 +33(0)658543545

16 [remi.gschwind@inserm.fr](mailto:remi.gschwind@inserm.fr)

17

## 18 **Abstract**

19 Metagenomics can be used to monitor the spread of antibiotic resistance genes (ARGs). ARGs  
20 found in databases such as ResFinder and CARD primarily originate from culturable and  
21 pathogenic bacteria. However, ARGs composing the resistome of the human gut microbiota or  
22 the environment remain understudied. Functional metagenomics is based on phenotypic gene  
23 selection and can identify ARGs from non-culturable bacteria with a potentially low identity  
24 shared with known ARGs. In 2016, the ResFinderFG v1.0 database was created to collect ARGs  
25 from functional metagenomics studies. Here, we present the database second version,  
26 ResFinderFG v2.0. Functional metagenomics studies were analyzed and DNA sequences  
27 described were retrieved, deduplicated and annotated. Sequences were curated to include only  
28 ARG sequences. ResFinderFG v2.0 was then compared to other databases for their relative  
29 sensitivity in searches for ARGs in subcatalogs from the Global Microbial Gene Catalog  
30 (GMGC). Fifty publications were considered, for a total of 23'764 ARGs identified from different  
31 environments. After deduplication, annotation and curation, 3'913 ARGs were included. New  
32 ARGs included are mainly glycopeptides/cycloserine or beta-lactams resistance genes identified  
33 mostly in human-associated samples. Results of GMGC gene subcatalogs annotation showed  
34 that ResFinderFG v2.0 detected comparable or higher ARG numbers than those detected with  
35 other databases. Most of the unigene hits obtained were database-specific and ResFinderFG  
36 v2.0 specific unigene hits included among others: glycopeptides/cycloserine,  
37 sulofnamides/trimethoprim resistance genes and beta-lactamases encoding genes.  
38 ResFinderFG v2.0 can be used to identify ARGs differing from those found in conventional  
39 databases and therefore improve the description of resistomes.

## 40 **Introduction**

41 Antimicrobial resistance (AMR) is recognized as a global threat possibly leading to the lack of  
42 efficient treatment against deadly infections<sup>1</sup>. From a genetic perspective, AMR is driven by  
43 mutational events (e.g. fluoroquinolone resistance is driven by mutations in the topoisomerase-  
44 encoding genes) and the expression of antibiotic resistance genes (ARGs). ARGs are  
45 widespread in human- and animal-associated microbiomes, and in the environment<sup>2</sup>. Hence,  
46 these microbial niches are now considered in a One Health manner<sup>3</sup>. Although not every ARG  
47 represents a direct risk for human health<sup>4</sup>, genes are able to travel from one environment to  
48 another by strain dissemination or horizontal gene transfer<sup>5</sup>. In this way, some ARGs represent a  
49 risk as they may be transferred to pathogenic bacteria.

50 Identifying ARGs and assessing this risk is essential to better understand and putatively find  
51 means to prevent their dissemination in pathogenic bacteria. To identify ARGs, culture-based  
52 methods, PCR, qPCR<sup>6</sup>, genomic and metagenomic sequencing have been used. Metagenomics  
53 makes it possible to sequence all the DNA from a sample and, thanks to sequences comparison  
54 with specific databases, allows ARG identification in an environment or host. Several AMR  
55 public reference databases<sup>7</sup> exist such as CARD<sup>8</sup> or ResFinder<sup>9</sup>. However, since the detection is  
56 matching newly obtained sequences to ARG sequences in databases, only sequences that are  
57 similar to previously-described ones will be detected with an acceptable degree of confidence.  
58 Therefore, unknown ARGs, or ARGs sharing a low identity with ARGs included in the chosen  
59 database may not be detected.

60 Although culturable and/or pathogenic bacteria only represent a small fraction of microbial  
61 diversity, their genes make up the vast majority of the ARGs present in existing databases. In  
62 order to detect new ARGs or low sequence similarity percentage ARGs, functional  
63 metagenomics has been used<sup>10</sup>. This technique is based on phenotypic detection by expressing  
64 exogenous DNA in an antibiotic-susceptible host. Using functional metagenomics, ARGs sharing  
65 low amino acid identity to their closest homologue in NCBI<sup>11</sup>, or even not previously classified as  
66 ARGs<sup>12</sup>, could be detected in human<sup>12–22</sup>, animal<sup>22–29</sup>, wastewater<sup>30–37</sup> and other environmental  
67 samples<sup>5,11,38–60</sup>. Despite being a laborious technique, genes described by functional  
68 metagenomics are mainly absent in classical ARG databases. Two databases listing specifically  
69 functionally identified ARGs were created: ResFinderFG v1.0<sup>61</sup> and FARME DB<sup>62</sup>. ResFinderFG  
70 v1.0 (<https://cge.food.dtu.dk/services/ResFinderFG-1.0/>) was based on the data coming from 4  
71 publications, while FARME DB includes data from 30 publications, mainly reporting  
72 environmental genes which were not necessarily cured to include only ARGs sequences<sup>63</sup>. Here,  
73 we report a new version of the ResFinderFG database, ResFinderFG v2.0, providing well-  
74 curated data from functional metagenomics publications available until 2021 that include  
75 environmental and host-associated samples.

## 76 **Methods**

### 77 **Construction of ResFinderFG v.2.0**

78 To retrieve publications using functional metagenomics for the identification of antibiotic  
79 resistance genes, the 4 publications used to construct ResFinderFG v1.0 were first considered.  
80 Then, all the publications which were cited by these 4 publications and all the publications that  
81 cited one of these publications were collected. In addition, publications found with the following

82 terms on PubMed: “functional metagenomics” AND “antibiotic resistance”, were added to this  
83 pool. After filtering out all the reviews, publications were screened one by one to check whether  
84 functional metagenomics was actually used to study antibiotic resistance and whether insert  
85 sequences described were available. Database construction and curation was then performed  
86 as follows (Figure 1). Accession numbers describing insert DNA sequences functionally selected  
87 using antibiotics were included and DNA sequences were retrieved using Batch Entrez. CD-  
88 HIT<sup>64</sup> was used to remove redundant DNA sequences and annotation of the remaining was done  
89 using PROKKA v.1.14<sup>65</sup>. To specifically select insert DNA sequences with ARG annotations, a  
90 representative pool of ARG annotations was obtained by applying the PROKKA annotation  
91 process to the ResFinder v4.0 database. Resulting annotations were used as a reference to  
92 specifically select insert DNA sequences containing an ARG. Accession number of the  
93 remaining inserts were used to retrieve information on the insert DNA sequences, such as the  
94 origin of the sample and the antibiotic used for selection. Additional filtering steps were added to  
95 check the antibiotic used for selection and ARG annotation link, minimum gene size with at list  
96 the median amino acid (aa) size of antibiotic resistance determinant (ARD) from the same ARD  
97 family (260 aa for beta-lactamase, 378 for tetracycline efflux genes, 641 aa for tetracycline  
98 resistance ribosomal protection genes, 178 aa for chloramphenicol acetyltransferase, 247 aa for  
99 methyltransferase genes and 158 aa for dihydrofolate reductase genes) and the presence of one  
100 unique annotation corresponding to an ARG on the insert DNA sequence. The database also  
101 includes metadata (habitat categorization, antibiotic used for selection, ARG family) and ARO  
102 annotation for each gene for comparability with other databases using ARO ontologies<sup>8</sup>.

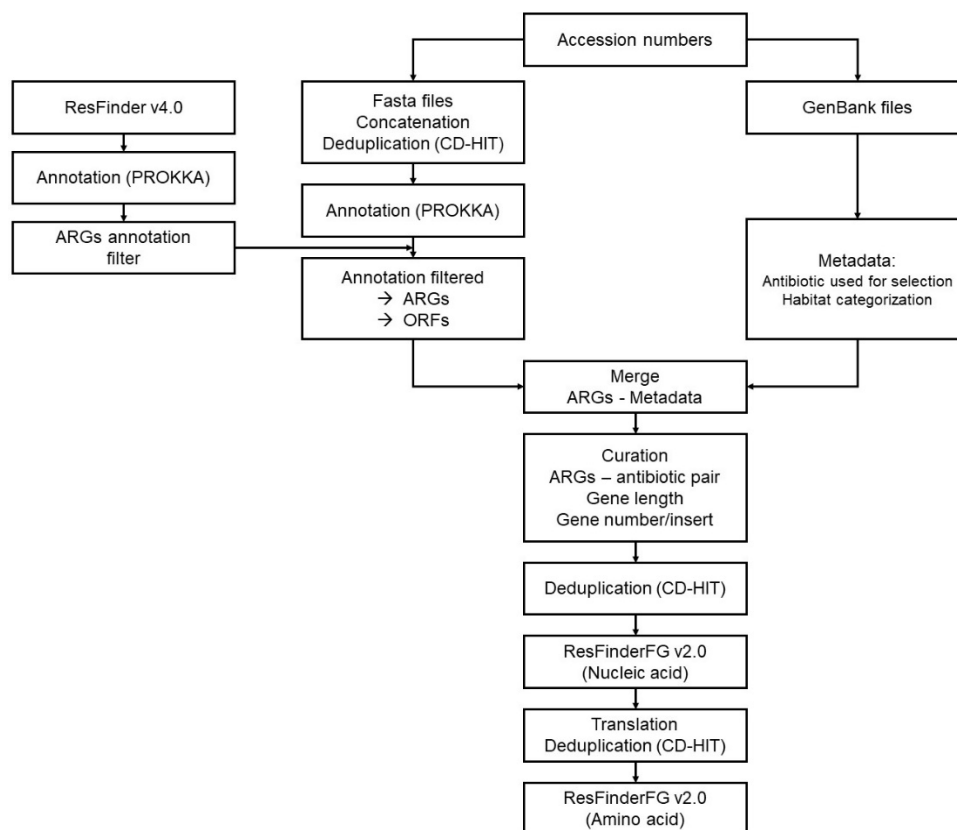

103

104 **Figure 1:** ResFinderFG v.2.0 construction workflow.

### 105 **Description of ResFinderFG v2.0**

106 To assess the update of the ResFinderFG v2.0 database, the database was first compared in  
107 terms of number of ARGs, ARG families and sample sources with ResFinderFG v1.0. ARG  
108 families were categorized according to the antibiotic families they conferred resistance to:  
109 glycopeptides/cycloserine, sulfonamides/trimethoprim, beta-lactams, aminoglycosides,  
110 macrolides-lincosamides-streptogramins, tetracyclines, phenicols and quinolones. Sample  
111 sources were categorized as follows: aquatic, animal-associated, human-associated, plants-  
112 associated, polluted environment and soil. Then, to detect the presence of ARGs in several gene  
113 subcatalogs (human gut, soil and marine-freshwater) coming from the Global Microbial Gene  
114 Catalog (GMGC, <https://gmgc.embl.de/download.cgi><sup>2</sup>), ABRicate<sup>66</sup> was run using default  
115 parameters with different databases (ResFinderFG v2.0, ResFinder v4.0, CARD v3.0.8, ARG-  
116 ANNOT v5, NCBI v3.6).

### 117 **Data and code availability**

118 All the computational steps and data used in the construction of the ResFinderFG v2.0 database  
119 and the database itself are available on the following public GitHub repository:  
120 [https://github.com/RemiGSC/ResFinder\\_FG\\_Construction](https://github.com/RemiGSC/ResFinder_FG_Construction). The database was also deposited on  
121 the Center of Genomic Epidemiology (CGE) server, where it can be used online  
122 <https://cge.food.dtu.dk/services/ResFinderFG/>. Analysis processes for the description of  
123 ResFinderFG v2.0 are accessible on the following public GitHub repository:  
124 [https://github.com/RemiGSC/ResFinder\\_FG\\_Analysis](https://github.com/RemiGSC/ResFinder_FG_Analysis).

## 125 **Results**

### 126 **Construction of ResFinderFG v2.0**

127 A total of 50 publications using functional metagenomics to analyze ARG content were selected,  
128 resulting in 23'776 accession numbers. CD-HIT identified 2'629 perfectly redundant insert  
129 sequences (100% sequence identity). PROKKA identified 41'977 open reading frames (ORFs).  
130 Among them, 7'787 ORFs matched with an ARG annotation of ResFinder v4.0 (228 unique ARG  
131 annotations). Another 1'165 ORFs were removed because of a discordance between the  
132 annotation and the antibiotic used for selection in the functional metagenomics experiment,  
133 1'064 for an unexpected size relative to the ARG family, and 398 because more than one  
134 putative ARG was present in the insert. A second round of CD-HIT was used to avoid  
135 redundancy (100% sequence identity) in the ARG sequences and 3'913 ARGs remained and  
136 form the database.

### 137 **Comparison with ResFinderFG v1.0**

138 First, the ARGs present in ResFinderFG v.2.0 were compared to the ones present in  
139 ResFinderFG v1.0 (Figure 2). A total of 1'631 new ARGs were present in ResFinderFG v.2.0,  
140 mainly due to new glycopeptides/cycloserine (+906 genes) and beta-lactams (+333 genes)  
141 resistance genes. The glycopeptides/cycloserine resistance genes were mostly annotated as  
142 homologues of D-Ala-D-X ligase. New beta-lactams antibiotics used for functional selection  
143 compared to v1.0 were cefepime, meropenem and tazobactam. Regarding the sources of ARGs,  
144 new ARGs mostly originated from human-associated samples (+1'333 genes).

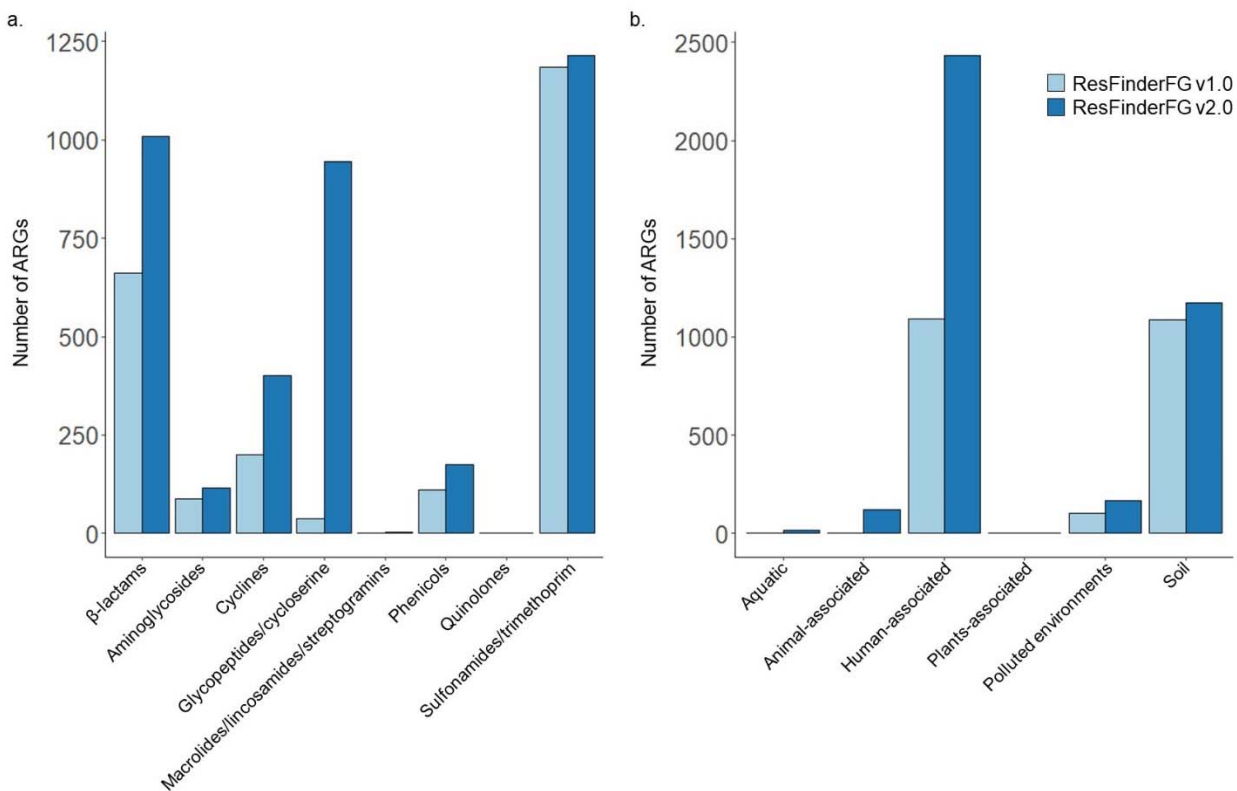

145

146 **Figure 2:** a. Number of ARGs in the ResFinderFG v.1.0 and v.2.0 databases depending on a.  
147 the antibiotic families involved; b. the sample sources.

148 **ARG detection in several GMGC gene subcatalogs using ResFinderFG v.2.0 and other**  
149 **databases**

150 ABRicate (default parameters) was used to detect ARGs in GMGC human gut (Figure 3), soil  
151 (Supplementary Figure 1a.) and aquatic (marine and freshwater) subcatalogs (Supplementary  
152 Figure 1b.). Using ResFinderFG v2.0, 3'025, 211 and 129 unigene hits were obtained analyzing  
153 human gut, soil and aquatic subcatalogs respectively. The 3 most frequently detected ARG  
154 families in all gene catalogs were glycopeptides/cycloserine resistance genes (20.9 to 39.7% of  
155 detected ARGs), sulfonamides/trimethoprim resistance genes (21.8 to 58.1% of detected ARGs)  
156 and beta-lactamases encoding genes (7.9 to 25.6% of detected ARGs). Phenicol's (up to 6.0% of  
157 detected ARGs), aminoglycosides (up to 5.3%), cyclines (up to 6.2%) and macrolides/  
158 lincosamides/streptogramins resistance genes (up to 0.03%) were also detected. Also,  
159 ResFinderFG v2.0 provides habitat information on where a given ARG was first identified by  
160 functional metagenomics. A majority of ARGs identified in the gut subcatalog (90.2%) were  
161 indeed initially identified in the human gut by functional metagenomics (supplementary table 2).

162 In the soil gene subcatalog, 62.6% of ARGs detected were also genes identified initially in soil  
 163 with functional metagenomics. However, ARGs detected in the aquatic gene subcatalog were  
 164 primarily first identified by functional metagenomics in soil.

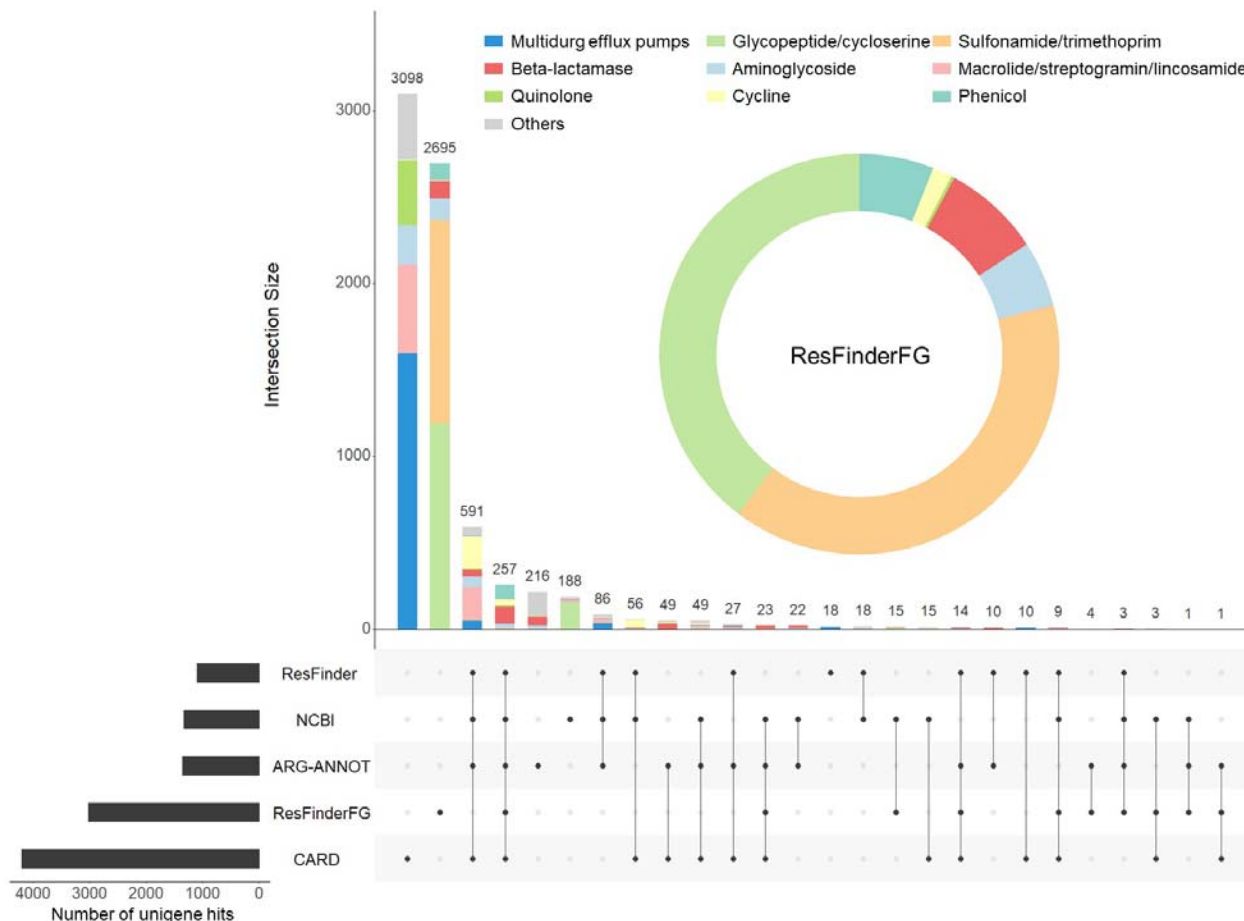

165  
 166 **Figure 3:** Number of unigene hits obtained analyzing GMGC human gut subcatalog using  
 167 several databases (ResFinder v4.0, NCBI v3.6, ARG-ANNOT v5, ResFinderFG v2.0 and CARD  
 168 v3.0.8) annotated by their antibiotic family. Others: bicyclomycin, beta-lactams, bleomycin,  
 169 disinfectant and antiseptic agents, fosfomycin, fusidic acid, multidrug, mupirocin, nitroimidazole,  
 170 nucleoside, peptide, rifampicin, streptothricin.

171 To compare ResFinderFG v2.0 to other databases, we ran the same ABRicate analysis of  
 172 GMGC gene subcatalogs using ResFinder v.4.0, CARD v3.0.8, ARG-ANNOT v5 and NCBI v3.6.  
 173 ResFinderFG v2.0 identified a comparable or even greater number of ARGs compared to other  
 174 databases. We observed that the most frequently observed ARG family depended on the  
 175 database used. In the human gut gene subcatalog, glycopeptides/cycloserine resistance gene



176 was the most frequent ARG family found by ResFinderFG v2.0 (39.7% of all unigene hits  
177 obtained with ResFinderFG v2.0). In contrast, the beta-lactamase family was the top ARG family  
178 with ARG-ANNOT (21.2%). NCBI and ResFinder detected mostly tetracycline resistance genes  
179 (20.4 and 23.8% respectively). Finally, multidrug efflux pump unigene hits were the most  
180 frequent using CARD (39.4%).

181 ResFinderFG v2.0 was the database with the highest fraction of database-specific hits, with  
182 89.1% of specific unigene hits composed mainly by glycopeptides/cycloserine resistance genes  
183 (D-alanine-D-alanine ligase ; supplementary table 3) and sulfonamides/trimethoprim resistance  
184 genes (dihydrofolate reductase). By comparison, CARD had 73.7% of specific unigene hits,  
185 mostly composed by gene encoding multidrug efflux pumps. Of note, 16.2% of unique CARD  
186 specific multidrug efflux pump unigene hits found in the human gut were regulatory genes  
187 (supplementary Table 3).

188 Between 2.6 and 4.2% of all unigene hits depending on the gene subcatalog analyzed were  
189 shared by all the databases used. Beta-lactamases – encoding genes were the most prevalent  
190 among them (ranging from 38.1 to 51.3% of the shared unigene hits), followed by, phenicols,  
191 aminoglycosides and tetracyclines resistance genes. However, 25.1, 23.2 and 46.3% of beta-  
192 lactamases, aminoglycosides and phenicols resistance genes respectively, were only detected  
193 using ResFinderFG v2.0 (Figure 3; supplementary Figure 1).

## 194 **Discussion**

195 ResFinderFG v2.0 contains 3'913 ARGs which were described with functional metagenomics in  
196 50 publications. Here, we showed that using ResFinderFG v2.0 enabled us to describe the  
197 resistome with ARGs that were not detected by other databases. Notably, ResFinderFG v2.0  
198 permitted a better description of sulfonamides/trimethoprim, glycopeptides/cycloserine resistant  
199 genes and beta-lactamase encoding genes.

200 Exhaustive description of ARG content in the environment can be complicated since most ARG  
201 databases are biased towards ARGs coming from culturable and/or pathogenic bacteria. One  
202 way to detect genes that are not described in such databases, or that are too different from  
203 described genes, is to use functional metagenomics: a laborious and low throughput method that  
204 was used by only a few research groups<sup>10</sup> which allows phenotypic identification rather than  
205 sequence-based identification of ARGs. Yet, most of the ARGs characterized using functional  
206 metagenomics were not deposited in ARG databases until the creation of ResFinderFG v1.0 in

207 2016<sup>61</sup>. Since then, the database has not been updated but another database called FARME DB  
208 was made including data coming from 30 publications<sup>62</sup>. Nevertheless, it contains all the inserts  
209 sequences selected with functional metagenomics and therefore it also contains genes that are  
210 not ARGs<sup>63</sup>. Therefore, we updated ResFinderFG v1.0 by including more publications using  
211 functional metagenomics to characterize ARGs and we made a curation effort to ensure that the  
212 sequences described are the unique ARGs responsible for the resistance phenotype in the initial  
213 insert sequence.

214 ResFinderFG v2.0 includes more ARGs coming from human-associated samples<sup>12-22</sup>. For  
215 example, characterization of the gut resistome with functional metagenomics showed that its  
216 ARGs were not well described in ARG databases<sup>14</sup>. Inclusion of these ARGs is therefore  
217 important for future metagenomic characterization of resistomes. Regarding the ARG family  
218 concerned, most of the new ARGs included compared to ResFinderFG v1.0 are  
219 glycopeptides/cycloserine or beta-lactams resistance genes. Glycopeptides/cycloserine  
220 resistance genes were selected using cycloserine, an antibiotic used in the therapy of  
221 tuberculosis caused by multi resistant mycobacteria<sup>67</sup>. Beta-lactams resistant genes are of high  
222 concern because beta-lactams antibiotics are widely used against priority pathogens<sup>68</sup>.

223 Using ResFinderFG v2.0, sulfonamides/trimethoprim, glycopeptides/cycloserine, beta-lactams,  
224 phenicols, cyclines, quinolones, macrolides/lincosamides/streptogramins and aminoglycosides  
225 resistance genes were evidenced studying three GMGC gene subcatalogs (human gut, soil and  
226 aquatic). As expected, regarding their representation in the database, the most frequent unigene  
227 hits were glycopeptide, cycloserine, sulfonamides/trimethoprim resistance genes. Analogous  
228 analyses performed with other databases showed that ResFinderFG v2.0 detected a  
229 comparable or higher number of ARGs depending on the other database used. Beta-lactamase  
230 encoding genes were the most represented ARGs in unigene hits shared by all databases. Yet,  
231 ResFinderFG v2.0 allowed the detection of a significant proportion of beta-lactamases encoding  
232 genes which were not detected with other databases. It was expected since many publications  
233 using functional metagenomics reported beta-lactamase encoding genes distant from the ones  
234 described in ARG databases<sup>11,14,31,34,46,54,59</sup> and a distant one has been evidenced recently from  
235 soil samples<sup>39</sup>. Other antibiotic families were even more specifically associated with  
236 ResFinderFG v2.0, such as sulfonamides/trimethoprim, phenicols, glycopeptides/cycloserine  
237 resistance genes.

238 Our study has limitations, however. To ensure that genes included are true ARGs, we selected  
239 only insert which had part of their sequence annotated as an ARG by PROKKA. Thus, ARGs not  
240 identified by PROKKA may have been missed. Moreover, we did not recheck whether described  
241 sequences were actually conferring resistance *in vitro*. Only the sequence corresponding to the  
242 ARG annotation was included and we were not able to determine if the surrounding insert DNA  
243 sequence was required to produce the resistant phenotype. Yet, since the original accession  
244 numbers are available in each ResFinderFG v2.0 ARG sequence header, researchers can  
245 easily obtain the complete insert DNA sequence to investigate.

## 246 **Conclusion**

247 ResFinderFG v2.0 is the new version of the ResFinderFG v1.0 database and includes 1'631  
248 additional ARGs. This makes possible the detection of ARGs which would not be identified using  
249 other currently used databases. Nevertheless, other databases also contain ARGs that are  
250 absent in ResFinderFG v2.0. Therefore, to make an exhaustive description of the resistome of a  
251 sample, ResFinderFG v2.0 should be used alongside other databases.

## 252 **Acknowledgements**

253 The authors are grateful to Frank Møller Aarestrup and Maja Weiss for hosting ResFinderFG  
254 v2.0 on the Center for Genomic Epidemiology website, and to Andrew Bielski for English editing.

## 255 **Conflicts of interest**

256 All authors: none

## 257 **Funding**

258 This work was funded by the Joint Program Initiative for Antimicrobial Resistance (JPIAMR)  
259 EMBARK (Establishing a Monitoring Baseline for Antimicrobial Resistance in Key environments)  
260 project (International Development Research Centre, IDRC, grant 109304-001 to LPC, Agence  
261 Nationale de la Recherche, ANR, grant ANR-19-JAMR-0004 to ER).

## 262 **References**

263 1. WHO. Antimicrobial resistance. [https://www.who.int/news-room/fact-](https://www.who.int/news-room/fact-sheets/detail/antimicrobial-resistance)  
264 [sheets/detail/antimicrobial-resistance.](https://www.who.int/news-room/fact-sheets/detail/antimicrobial-resistance)

- 265 2. Coelho, L. P. *et al.* Towards the biogeography of prokaryotic genes. *Nature* **601**, 252–  
266 256 (2022).
- 267 3. Mackenzie, J. S. & Jeggo, M. The One Health Approach—Why Is It So Important? *Trop.*  
268 *Med. Infect. Dis.* **4**, 88 (2019).
- 269 4. Martínez, J. L., Coque, T. M. & Baquero, F. What is a resistance gene? Ranking risk in  
270 resistomes. *Nat. Rev. Microbiol.* **13**, 116–123 (2015).
- 271 5. Forsberg, K. J. *et al.* The shared antibiotic resistome of soil bacteria and human  
272 pathogens. *Science* **337**, 1107–1111 (2012).
- 273 6. Waseem, H. *et al.* Contributions and Challenges of High Throughput qPCR for  
274 Determining Antimicrobial Resistance in the Environment: A Critical Review. *Molecules* **24**, 163  
275 (2019).
- 276 7. Boolchandani, M., D’Souza, A. W. & Dantas, G. Sequencing-based methods and  
277 resources to study antimicrobial resistance. *Nat. Rev. Genet.* **20**, 356–370 (2019).
- 278 8. Alcock, B. P. *et al.* CARD 2020: antibiotic resistome surveillance with the comprehensive  
279 antibiotic resistance database. *Nucleic Acids Res.* **48**, D517–D525 (2020).
- 280 9. Zankari, E. *et al.* Identification of acquired antimicrobial resistance genes. *J. Antimicrob.*  
281 *Chemother.* **67**, 2640–2644 (2012).
- 282 10. Dos Santos, D. F. K., Istvan, P., Quirino, B. F. & Kruger, R. H. Functional Metagenomics  
283 as a Tool for Identification of New Antibiotic Resistance Genes from Natural Environments.  
284 *Microb. Ecol.* **73**, 479–491 (2017).
- 285 11. Forsberg, K. J. *et al.* Bacterial phylogeny structures soil resistomes across habitats.  
286 *Nature* **509**, 612–616 (2014).

- 287 12. Gibson, M. K. *et al.* Developmental dynamics of the preterm infant gut microbiota and  
288 antibiotic resistome. *Nat. Microbiol.* **1**, 16024 (2016).
- 289 13. Moore, A. M. *et al.* Pediatric fecal microbiota harbor diverse and novel antibiotic  
290 resistance genes. *PloS One* **8**, e78822 (2013).
- 291 14. Sommer, M. O. A., Dantas, G. & Church, G. M. Functional Characterization of the  
292 Antibiotic Resistance Reservoir in the Human Microflora. *Science* **325**, 1128–1131 (2009).
- 293 15. Pehrsson, E. C. *et al.* Interconnected microbiomes and resistomes in low-income human  
294 habitats. *Nature* **533**, 212–216 (2016).
- 295 16. Reynolds, L. J., Anjum, M. F. & Roberts, A. P. Detection of a Novel, and Likely Ancestral,  
296 Tn916-Like Element from a Human Saliva Metagenomic Library. *Genes* **11**, E548 (2020).
- 297 17. Kintses, B. *et al.* Phylogenetic barriers to horizontal transfer of antimicrobial peptide  
298 resistance genes in the human gut microbiota. *Nat. Microbiol.* **4**, 447–458 (2019).
- 299 18. Clemente, J. C. *et al.* The microbiome of uncontacted Amerindians. *Sci. Adv.* **1**,  
300 e1500183 (2015).
- 301 19. Card, R. M. *et al.* Application of microarray and functional-based screening methods for  
302 the detection of antimicrobial resistance genes in the microbiomes of healthy humans. *PloS One*  
303 **9**, e86428 (2014).
- 304 20. Cheng, G. *et al.* Functional screening of antibiotic resistance genes from human gut  
305 microbiota reveals a novel gene fusion. *FEMS Microbiol. Lett.* **336**, 11–16 (2012).
- 306 21. Moore, A. M. *et al.* Gut resistome development in healthy twin pairs in the first year of life.  
307 *Microbiome* **3**, 27 (2015).
- 308 22. Campbell, T. P. *et al.* The microbiome and resistome of chimpanzees, gorillas, and  
309 humans across host lifestyle and geography. *ISME J.* **14**, 1584–1599 (2020).

- 310 23. Flórez, A. B., Vázquez, L. & Mayo, B. A Functional Metagenomic Analysis of Tetracycline  
311 Resistance in Cheese Bacteria. *Front. Microbiol.* **8**, 907 (2017).
- 312 24. Versluis, D. *et al.* Sponge Microbiota Are a Reservoir of Functional Antibiotic Resistance  
313 Genes. *Front. Microbiol.* **7**, 1848 (2016).
- 314 25. Wichmann, F., Udikovic-Kolic, N., Andrew, S. & Handelsman, J. Diverse antibiotic  
315 resistance genes in dairy cow manure. *mBio* **5**, e01017 (2014).
- 316 26. Tian, B., Fadhil, N. H., Powell, J. E., Kwong, W. K. & Moran, N. A. Long-term exposure to  
317 antibiotics has caused accumulation of resistance determinants in the gut microbiota of  
318 honeybees. *mBio* **3**, (2012).
- 319 27. Martiny, A. C., Martiny, J. B. H., Weihe, C., Field, A. & Ellis, J. C. Functional  
320 Metagenomics Reveals Previously Unrecognized Diversity of Antibiotic Resistance Genes in  
321 Gulls. *Front. Microbiol.* **2**, (2011).
- 322 28. Allen, H. K. *et al.* Resident microbiota of the gypsy moth midgut harbors antibiotic  
323 resistance determinants. *DNA Cell Biol.* **28**, 109–117 (2009).
- 324 29. Wang, X.-R. *et al.* Duck wastes as a potential reservoir of novel antibiotic resistance  
325 genes. *Sci. Total Environ.* **771**, 144828 (2021).
- 326 30. McGivern, B. B., McDonnell, R. K., Morris, S. K., LaPara, T. M. & Donato, J. J. Novel class  
327 1 integron harboring antibiotic resistance genes in wastewater-derived bacteria as revealed by  
328 functional metagenomics. *Plasmid* **114**, 102563 (2021).
- 329 31. Marathe, N. P. *et al.* Sewage effluent from an Indian hospital harbors novel  
330 carbapenemases and integron-borne antibiotic resistance genes. *Microbiome* **7**, 97 (2019).

- 331 32. Cameron, A. *et al.* Functional screening for triclosan resistance in a wastewater  
332 metagenome and isolates of *Escherichia coli* and *Enterococcus spp.* from a large Canadian  
333 healthcare region. *PLoS One* **14**, e0211144 (2019).
- 334 33. Zhang, L. *et al.* Novel clinically relevant antibiotic resistance genes associated with  
335 sewage sludge and industrial waste streams revealed by functional metagenomic screening.  
336 *Environ. Int.* **132**, 105120 (2019).
- 337 34. Marathe, N. P. *et al.* Functional metagenomics reveals a novel carbapenem-hydrolyzing  
338 mobile beta-lactamase from Indian river sediments contaminated with antibiotic production  
339 waste. *Environ. Int.* **112**, 279–286 (2018).
- 340 35. González-Plaza, J. J. *et al.* Functional Repertoire of Antibiotic Resistance Genes in  
341 Antibiotic Manufacturing Effluents and Receiving Freshwater Sediments. *Front. Microbiol.* **8**,  
342 (2018).
- 343 36. Munck, C. *et al.* Limited dissemination of the wastewater treatment plant core resistome.  
344 *Nat. Commun.* **6**, 8452 (2015).
- 345 37. Uyaguari, M. I., Fichot, E. B., Scott, G. I. & Norman, R. S. Characterization and  
346 quantitation of a novel  $\beta$ -lactamase gene found in a wastewater treatment facility and the  
347 surrounding coastal ecosystem. *Appl. Environ. Microbiol.* **77**, 8226–8233 (2011).
- 348 38. Willms, I. M. *et al.* Discovery of Novel Antibiotic Resistance Determinants in Forest and  
349 Grassland Soil Metagenomes. *Front. Microbiol.* **10**, 460 (2019).
- 350 39. Willms, I. M. *et al.* Novel Soil-Derived Beta-Lactam, Chloramphenicol, Fosfomycin and  
351 Trimethoprim Resistance Genes Revealed by Functional Metagenomics. *Antibiot. Basel Switz.*  
352 **10**, 378 (2021).

- 353 40. Obermeier, M. M. *et al.* Plant resistome profiling in evolutionary old bog vegetation  
354 provides new clues to understand emergence of multi-resistance. *ISME J.* **15**, 921–937 (2021).
- 355 41. Böhm, M.-E., Razavi, M., Flach, C.-F. & Larsson, D. G. J. A Novel, Integron-Regulated,  
356 Class C  $\beta$ -Lactamase. *Antibiot. Basel Switz.* **9**, E123 (2020).
- 357 42. Park, K. S. *et al.* The novel metallo- $\beta$ -lactamase PNGM-1 from a deep-sea sediment  
358 metagenome: crystallization and X-ray crystallographic analysis. *Acta Crystallogr. Sect. F Struct.*  
359 *Biol. Commun.* **74**, 644–649 (2018).
- 360 43. Wang, S. *et al.* Tetracycline Resistance Genes Identified from Distinct Soil Environments  
361 in China by Functional Metagenomics. *Front. Microbiol.* **8**, 1406 (2017).
- 362 44. Lau, C. H.-F., van Engelen, K., Gordon, S., Renaud, J. & Topp, E. Novel Antibiotic  
363 Resistance Determinants from Agricultural Soil Exposed to Antibiotics Widely Used in Human  
364 Medicine and Animal Farming. *Appl. Environ. Microbiol.* **83**, (2017).
- 365 45. Pawlowski, A. C. *et al.* A diverse intrinsic antibiotic resistome from a cave bacterium. *Nat.*  
366 *Commun.* **7**, 13803 (2016).
- 367 46. Gudeta, D. D. *et al.* Expanding the Repertoire of Carbapenem-Hydrolyzing Metallo- $\beta$ -  
368 Lactamases by Functional Metagenomic Analysis of Soil Microbiota. *Front. Microbiol.* **7**, 1985  
369 (2016).
- 370 47. Im, H., Kim, K. M., Lee, S.-H. & Ryu, C.-M. Functional Metagenome Mining of Soil for a  
371 Novel Gentamicin Resistance Gene. *J. Microbiol. Biotechnol.* **26**, 521–529 (2016).
- 372 48. Hatosy, S. M. & Martiny, A. C. The ocean as a global reservoir of antibiotic resistance  
373 genes. *Appl. Environ. Microbiol.* **81**, 7593–7599 (2015).
- 374 49. Perron, G. G. *et al.* Functional Characterization of Bacteria Isolated from Ancient Arctic  
375 Soil Exposes Diverse Resistance Mechanisms to Modern Antibiotics. *PLoS ONE* **10**, (2015).



- 376 50. Udikovic-Kolic, N., Wichmann, F., Broderick, N. A. & Handelsman, J. Bloom of resident  
377 antibiotic-resistant bacteria in soil following manure fertilization. *Proc. Natl. Acad. Sci. U. S. A.*  
378 **111**, 15202–15207 (2014).
- 379 51. Su, J. Q., Wei, B., Xu, C. Y., Qiao, M. & Zhu, Y. G. Functional metagenomic  
380 characterization of antibiotic resistance genes in agricultural soils from China. *Environ. Int.* **65**,  
381 9–15 (2014).
- 382 52. Cheng, G. *et al.* Identification of a novel fosfomycin-resistant UDP-N-acetylglucosamine  
383 enolpyruvyl transferase (MurA) from a soil metagenome. *Biotechnol. Lett.* **35**, 273 (2013).
- 384 53. López-Pérez, M., Mirete, S., Jardón-Valadez, E. & González-Pastor, J. E. Identification  
385 and modeling of a novel chloramphenicol resistance protein detected by functional  
386 metagenomics in a wetland of Lerma, Mexico. *Int. Microbiol. Off. J. Span. Soc. Microbiol.* **16**,  
387 103–111 (2013).
- 388 54. Vercammen, K. *et al.* Identification of a metagenomic gene cluster containing a new class  
389 A beta-lactamase and toxin-antitoxin systems. *MicrobiologyOpen* **2**, 674–683 (2013).
- 390 55. McGarvey, K. M., Queitsch, K. & Fields, S. Wide variation in antibiotic resistance proteins  
391 identified by functional metagenomic screening of a soil DNA library. *Appl. Environ. Microbiol.*  
392 **78**, 1708–1714 (2012).
- 393 56. Torres-Cortés, G. *et al.* Characterization of novel antibiotic resistance genes identified by  
394 functional metagenomics on soil samples. *Environ. Microbiol.* **13**, 1101–1114 (2011).
- 395 57. Lang, K. S. *et al.* Novel florfenicol and chloramphenicol resistance gene discovered in  
396 Alaskan soil by using functional metagenomics. *Appl. Environ. Microbiol.* **76**, 5321–5326 (2010).

- 397 58. Donato, J. J. *et al.* Metagenomic analysis of apple orchard soil reveals antibiotic  
398 resistance genes encoding predicted bifunctional proteins. *Appl. Environ. Microbiol.* **76**, 4396–  
399 4401 (2010).
- 400 59. Allen, H. K., Moe, L. A., Rodbumrer, J., Gaarder, A. & Handelsman, J. Functional  
401 metagenomics reveals diverse beta-lactamases in a remote Alaskan soil. *ISME J.* **3**, 243–251  
402 (2009).
- 403 60. Riesenfeld, C. S., Goodman, R. M. & Handelsman, J. Uncultured soil bacteria are a  
404 reservoir of new antibiotic resistance genes. *Environ. Microbiol.* **6**, 981–989 (2004).
- 405 61. Munk, P. *et al.* Abundance and diversity of the faecal resistome in slaughter pigs and  
406 broilers in nine European countries. *Nat. Microbiol.* **3**, 898–908 (2018).
- 407 62. Wallace, J. C., Port, J. A., Smith, M. N. & Faustman, E. M. FARME DB: a functional  
408 antibiotic resistance element database. *Database J. Biol. Databases Curation* **2017**, (2017).
- 409 63. Lal Gupta, C., Kumar Tiwari, R. & Cytryn, E. Platforms for elucidating antibiotic  
410 resistance in single genomes and complex metagenomes. *Environ. Int.* **138**, 105667 (2020).
- 411 64. Li, W. & Godzik, A. Cd-hit: a fast program for clustering and comparing large sets of  
412 protein or nucleotide sequences. *Bioinforma. Oxf. Engl.* **22**, 1658–1659 (2006).
- 413 65. Seemann, T. Prokka: rapid prokaryotic genome annotation. *Bioinforma. Oxf. Engl.* **30**,  
414 2068–2069 (2014).
- 415 66. Seemann, T. Abricate.
- 416 67. Di Perri, G. & Bonora, S. Which agents should we use for the treatment of multidrug-  
417 resistant *Mycobacterium tuberculosis*? *J. Antimicrob. Chemother.* **54**, 593–602 (2004).
- 418 68. WHO. Global Antimicrobial Resistance and Use Surveillance System (GLASS) Report:  
419 2021. <https://www.who.int/publications-detail-redirect/9789240027336>.
